# Supplementary material
Source: PubMed Central journal article supplement (PMC5541889)
Supplement: 2017_166439-Disclosures_and_Contributions.pdf [file 2017_166439-Disclosures_and_Contributions.pdf]

Haematologica  
HAEMATOL/2017/166439  
Version 3

p.Y317H is a new JAK2 gain-of function mutation affecting the FERM domain in a myelofibrosis patient with CALR mutation

Laura Eder-Azanza, Cristina Hurtado, David Navarro-Herrera, Paula Aranaz, Francisco J. Novo, and José L. Vizmanos

Disclosures: This work has been funded with the help of the PIUNA Program of the University of Navarra. L.E.-A. and D.N.-H. have PhD Studentships granted by the Ministry of Education, Culture and Sports of Spain (FPU14/03669 and FPU13/00424 respectively) within the University Faculty Training (FPU) program.

Contributions: L.E.-A. designed the research, performed the research, analysed data and wrote the manuscript. C.H. performed research. D.N.-H. conducted statistical analysis of data and critically reviewed and edited the manuscript. P.A. designed the research and critically reviewed and edited the manuscript. F.J.N designed the research and critically reviewed and edited the manuscript. J.L.V designed the research, analysed data and wrote the manuscript.
